# Supplementary figures and images for: Sidechain liquid crystal polymers derived from oxetane monomers containing 2 or 3fluorophenyl moieties in the core of the mesogen
Source: Royal Society of Chemistry journal article supplement (doi:10.1039/b009426i), 2001-01-01

**Colour version of Fig. 4:**


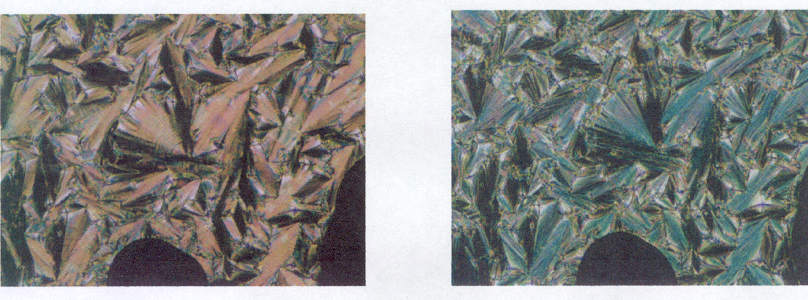

Supplement: b009426i.doc [file b009426i.doc]
